# Supplementary material for: MAP kinases differentially bind and phosphorylate NOS3 via two unique NOS3 sites
Source: PubMed Central journal article supplement (PMC9063426; doi:10.1002/2211-5463.13384), 2022-03-15
Supplement: FEB4-12-1075-s001.pdf [file FEB4-12-1075-s001.pdf]

Supporting information for MAP kinases differentially bind and phosphorylate NOS3 via two unique NOS3 sites

Supplemental Figure 1:

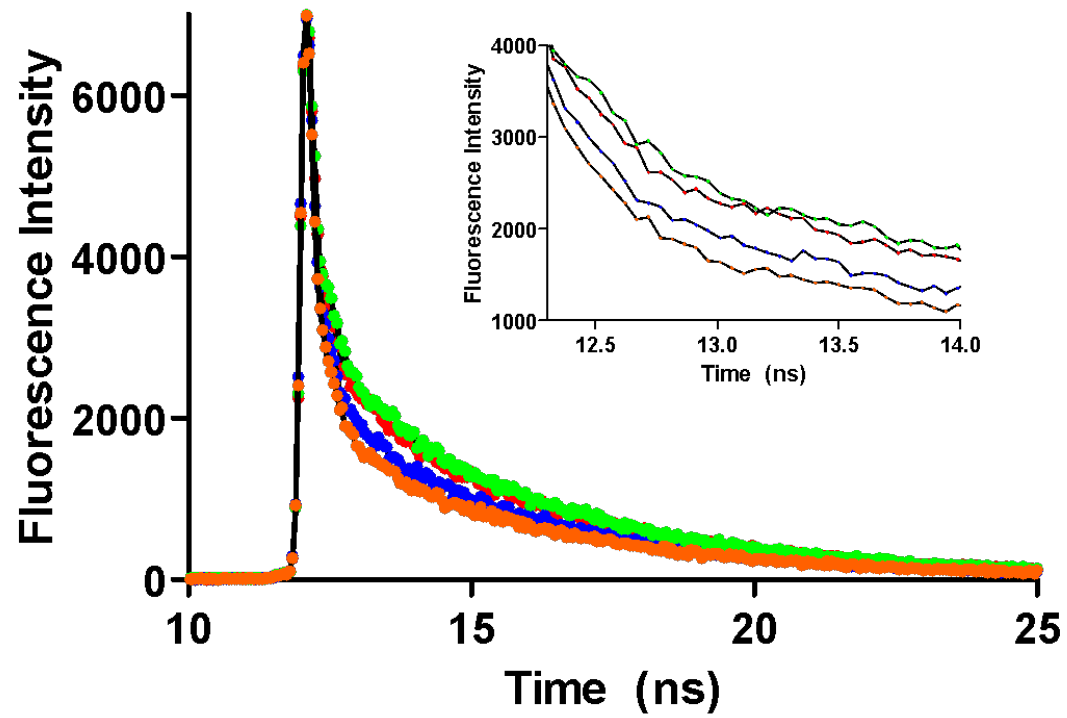

Figure S1. **Phosphorylation of NOS3 by JNK1 $\alpha$ 1 evinces no significant change in conformation.** Fluorescence decays of NOS3 holoenzyme FMN excited at 473 nm and detected at 525 nm. Blue is NOS3, green is CaM-bound NOS3, orange is JNK1 $\alpha$ 1-phosphorylated NOS3 and red is JNK1 $\alpha$ 1-phosphorylated, CaM-bound NOS3.

**Supplemental Table 1:** Global Association-then-dissociation model parameters and measures of goodness-of-fit

| <b>Fig. 2</b>                               | <b>Fig. 4</b>            |                      |                      |                        |                       |                        |                        |
|---------------------------------------------|--------------------------|----------------------|----------------------|------------------------|-----------------------|------------------------|------------------------|
|                                             | <b>A</b>                 | <b>B</b>             | <b>C</b>             | <b>D</b>               | <b>E</b>              | <b>F</b>               |                        |
| <b><u>Best-fit values</u></b>               |                          |                      |                      |                        |                       |                        |                        |
| $k_{on}$ (M <sup>-1</sup> s <sup>-1</sup> ) | 4106                     | 6605                 | 12135                | 17333                  | 15864                 | 14133                  | 84646                  |
| $k_{off}$ (s <sup>-1</sup> )                | 0.00006188               | 0.006226             | 0.002066             | 0.0005339              | 0.0009677             | 0.0005429              | 0.0002496              |
| $K_D$ (nM)                                  | 15                       | 940                  | 170                  | 31                     | 61                    | 38                     | 3                      |
| <b><u>95% Confidence Interval</u></b>       |                          |                      |                      |                        |                       |                        |                        |
| $k_{on}$                                    | 4046 to 4165             | 5914 to 7315         | 11712 to 12566       | 16814 to 17864         | 15210 to 16534        | 13346 to 14949         | 83304 to 86002         |
| $k_{off}$                                   | 5.745e-005 to 6.631e-005 | 0.006059 to 0.006398 | 0.002021 to 0.002112 | 0.0005230 to 0.0005449 | 0.0009290 to 0.001007 | 0.0005242 to 0.0005620 | 0.0002362 to 0.0002631 |
| <b><u>Goodness of Fit</u></b>               |                          |                      |                      |                        |                       |                        |                        |
| Degrees of Freedom                          | 4498                     | 4498                 | 2246                 | 4498                   | 2248                  | 3748                   | 2248                   |
| R squared                                   | 0.9987                   | 0.9758               | 0.9948               | 0.9883                 | 0.9937                | 0.9567                 | 0.995                  |
| Sum of Squares                              | 4.69                     | 1.488                | 2.871                | 5.203                  | 7.294                 | 1.296                  | 11.76                  |
| $Sy.x$                                      | 0.03229                  | 0.01819              | 0.03575              | 0.03401                | 0.05696               | 0.0186                 | 0.07233                |

$Sy.x$  = standard deviation of the residuals (Y), in nm shift
